# Supplementary material for: Identification of Binding Proteins for TSC22D1 Family Proteins Using Mass Spectrometry
Source: MDPI journal article supplement (doi:10.3390/ijms222010913), 2021-10-09
Supplement: s1 [file s1]

**Table S3. Mascot score and peptide match of the identified proteins from *In vivo* Flag-TSC22 (86) binding assay (HEK293, whole cell extracts)**

| Protein Names                                                   | Mascot score | Peptide match |
|-----------------------------------------------------------------|--------------|---------------|
| Histone H1.2                                                    | 62           | 6             |
| 40S ribosomal protein S6                                        | 129          | 4             |
| Keratin, type II cytoskeletal 1                                 | 165          | 9             |
| Keratin, type I cytoskeletal 9                                  | 147          | 7             |
| Actin, cytoplasmic 1                                            | 318          | 27            |
| Glyceraldehyde-3-phosphate dehydrogenase                        | 36           | 2             |
| Ubiquitin carboxyl-terminal hydrolase 47                        | 27           | 2             |
| Dermcidin                                                       | 35           | 2             |
| Protein tyrosine phosphatase receptor type C-associated protein | 26           | 5             |
| 40S ribosomal protein S2                                        | 30           | 1             |

LC/MS/MS data were analyzed using Mascot software against SwissProt database. Identified proteins with the score higher than 13 were listed on the Table S3.
