# Supplementary material for: Identification of Binding Proteins for TSC22D1 Family Proteins Using Mass Spectrometry
Source: MDPI journal article supplement (doi:10.3390/ijms222010913), 2021-10-09
Supplement: s1 [file s1]

**Table S2. Mascot score and peptide match of the identified proteins from *In vivo* Flag-TSC-22 binding assay (HEK293, nuclear extracts)**

| Protein Names                                                      | Mascot score | Peptide match |
|--------------------------------------------------------------------|--------------|---------------|
| Histone H1.2                                                       | 92           | 8             |
| Lamin-B1                                                           | 76           | 7             |
| Guanine nucleotide-binding protein-like 3                          | 36           | 4             |
| Pituitary adenylate cyclase-activating polypeptide type I receptor | 18           | 1             |
| Heterogeneous nuclear ribonucleoprotein A1                         | 53           | 3             |
| Charged multivesicular body protein 4a                             | 220          | 3             |
| rRNA 2'-O-methyltransferase fibrillarin                            | 41           | 1             |

LC/MS/MS data were analyzed using Mascot software against SwissProt database. Identified proteins with the score higher than 13 were listed on the Table S2.
