# Supplementary material for: Identification of Binding Proteins for TSC22D1 Family Proteins Using Mass Spectrometry
Source: MDPI journal article supplement (doi:10.3390/ijms222010913), 2021-10-09
Supplement: s1 [file s1]

**Table S1. Mascot score and peptide match of the identified proteins from GST-TSC-22pull-down assay (TYS, whole cell extracts)**

| Protein Names                                           | Mascot score | Peptide match |
|---------------------------------------------------------|--------------|---------------|
| Heat shock 70 kDa protein 1A/1B                         | 114          | 5             |
| Keratin, type II cytoskeletal 1                         | 256          | 20            |
| Pleckstrin homology domain-containing family G member 2 | 15           | 2             |
| Elongation factor 1-gamma                               | 268          | 20            |
| Rho-related GTP-binding protein Rho6                    | 13           | 6             |
| Carbonyl reductase [NADPH] 1                            | 244          | 9             |

LC/MS/MS data were analyzed using Mascot software against SwissProt database. Identified proteins with the score higher than 13 were listed on the Table S1.
