# Supplementary material for: Identification of Binding Proteins for TSC22D1 Family Proteins Using Mass Spectrometry
Source: Int J Mol Sci. 2021 Oct 9;22(20):10913. doi: 10.3390/ijms222010913 (PMC8536140; doi:10.3390/ijms222010913)
Supplement: Supplementary file 1 [file ijms-22-10913-s001.zip]

Archive with 6 entries (6 files):
- FigS1.jpg
- FigS2A.jpg
- FigS2B╕─.jpg
- Table S1.pdf
- Table S2.pdf
- Table S3.pdf
